# Supplementary material
Source: PubMed Central journal article supplement (PMC4587647)
Supplement: supp_db15-0153_DB150153SupplementaryData.pdf [file supp_db15-0153_DB150153SupplementaryData.pdf]

SUPPLEMENTARY DATA

**Supplementary Figure 1.** Isolation of CACs. (A) Confocal image of *Tp1:GFP; fli:rfp* fish used for Method 2. Notch-responsive cells (green, asterisks), endothelial cells (red, arrowheads), Notch-responsive endothelial cells (arrows). (B) FACS plots for Preparation 1 sorted using Method 1, and Preparation 2 using Method 2. (C) qPCR from sorted cells for the acinar cell marker *amylase*, the endothelial cell marker *cdh5*, *gfp*, and *sox9b*. Enrichment for *amylase* was not detected in any of the cell fractions.

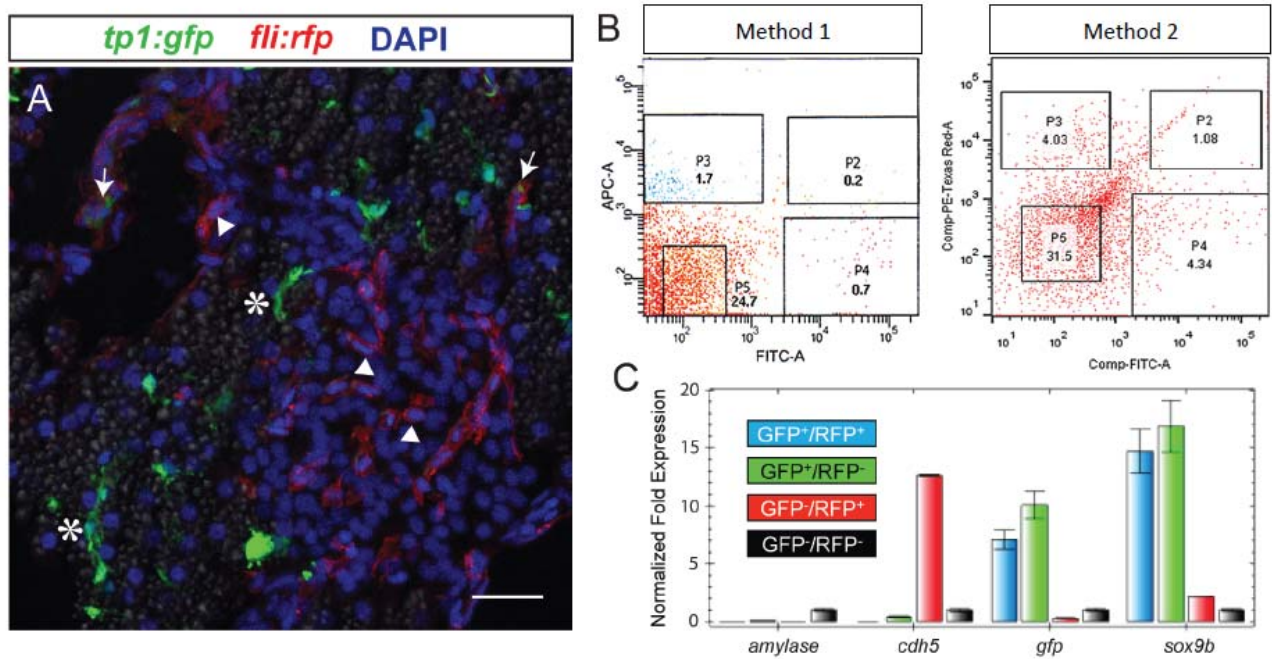

SUPPLEMENTARY DATA

**Supplementary Figure 2.** Functional annotation clustering of CAC-enriched genes. Clusters represent GO terms associated with developmental programming (Cluster 1), epithelial cell biology (Cluster 2), epithelial development (Cluster 3), and cell motility/cytoskeletal organization (Cluster 4).

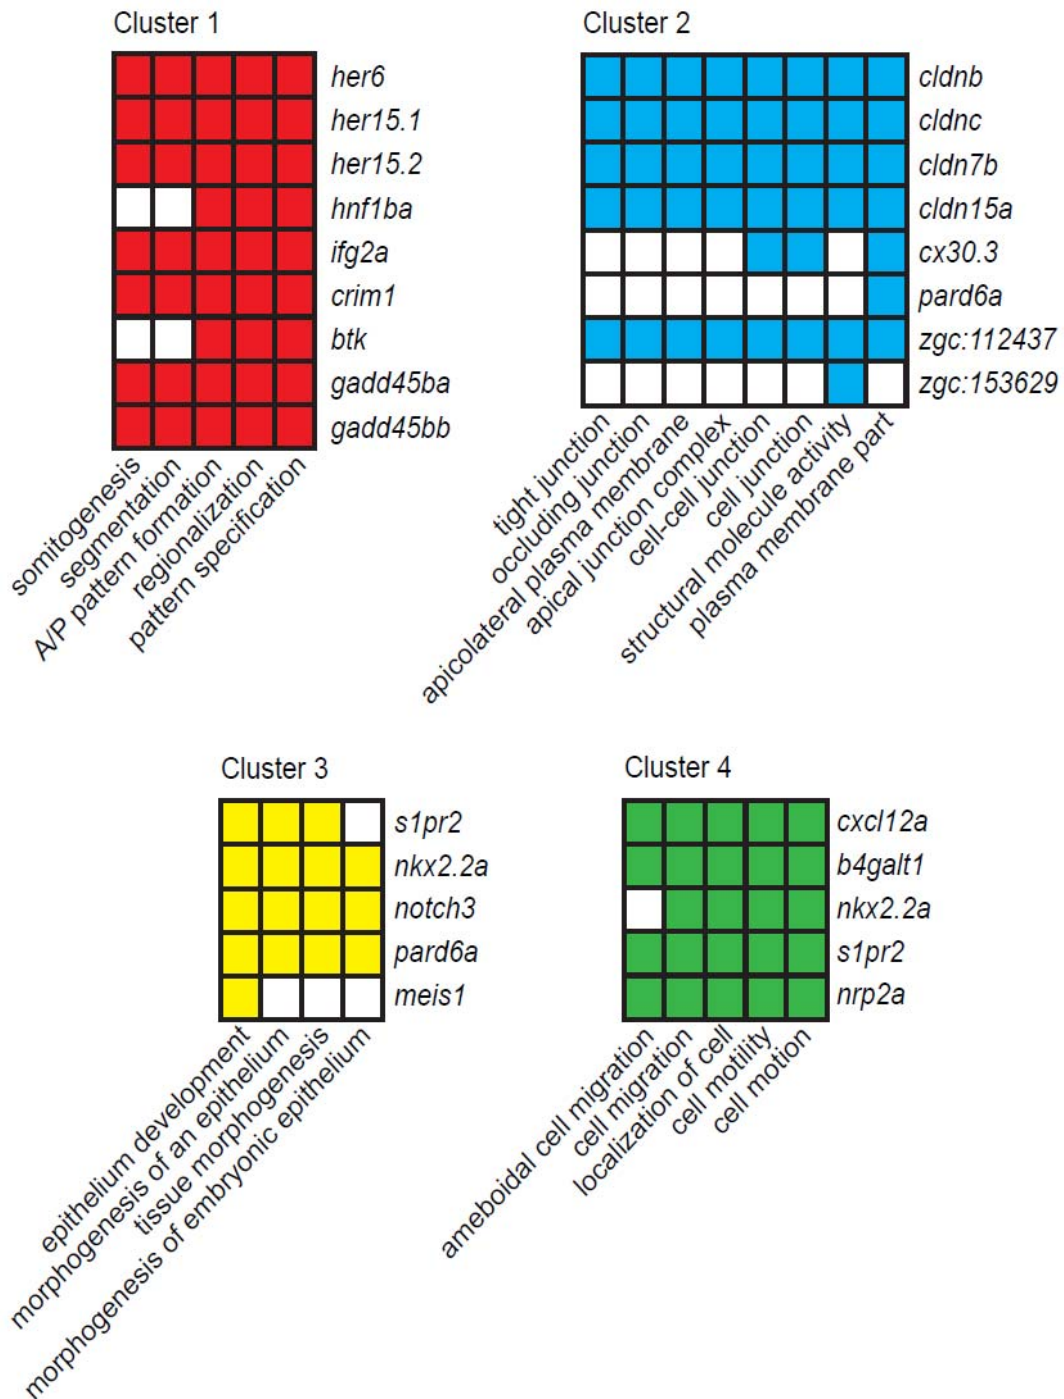

SUPPLEMENTARY DATA

**Supplementary Figure 3.** Quantification of  $\beta$ -cell regeneration. (A) Percentage of Glucagon+ volume in islets. (B) Number of single  $\beta$  cells and (C)  $\beta$ -cell clusters. Glucagon+ volume was calculated using Nikon NIS Elements 4.1 software. \* $p < 0.05$ , t-test compared to control. ns = not significant.

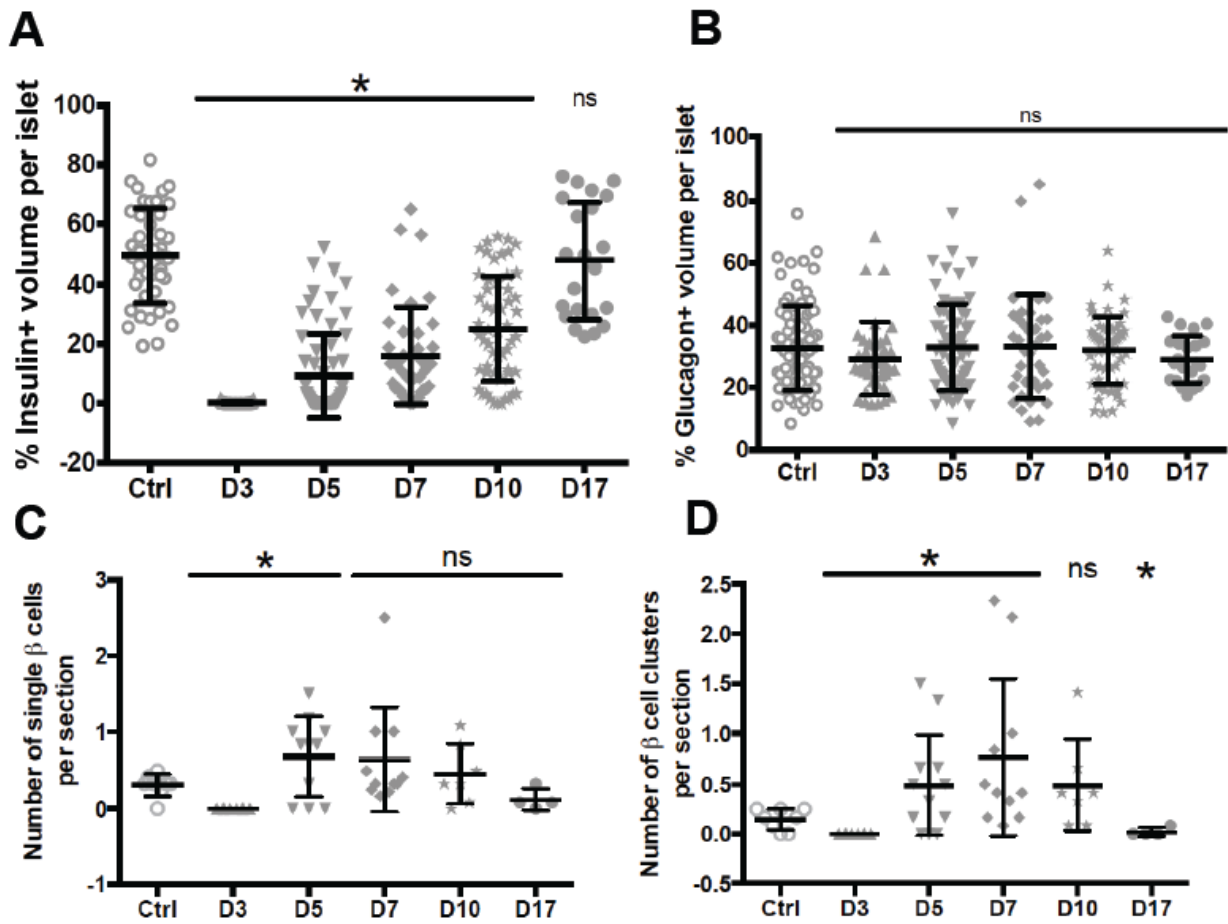

SUPPLEMENTARY DATA

**Supplementary Figure 4.** Proliferation following PPx. (A) EdU incorporation in adult pancreas at PPx +7 days. *Ptf1a:GFP* (green), EdU (red), DAPI (blue). scale bar = 20  $\mu$ m.

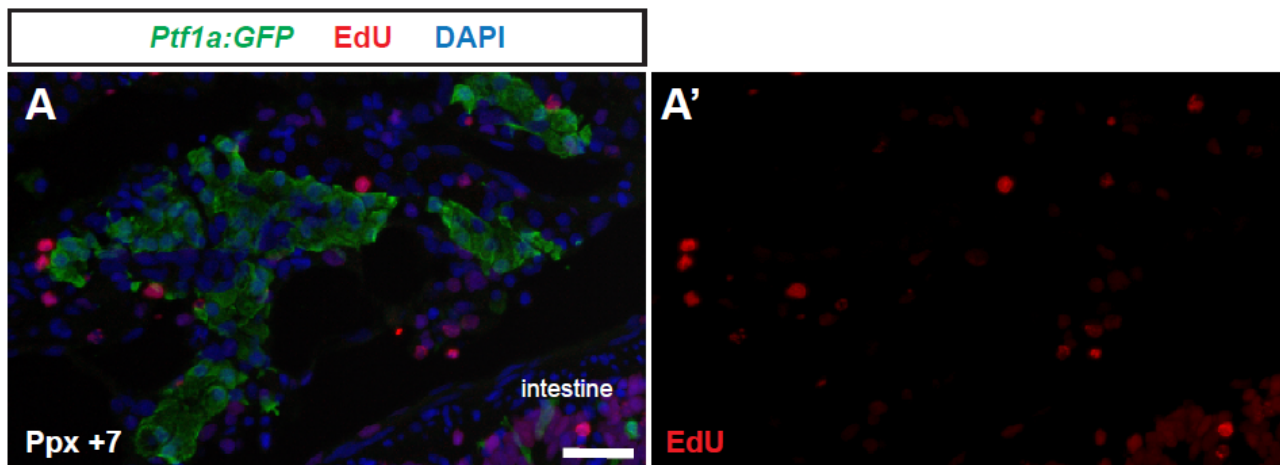

SUPPLEMENTARY DATA

**Supplementary Figure 5.** Glycemia in *cftr* mutant larvae. (A-B) Kupffer's vesicle (arrow) is clearly visible in wild-type embryos at the 10 somite stage (14 hpf), but is absent from *cftr*<sup>-/-</sup> embryos. (C) Glucose per embryo at 5 dpf is not significantly different in wild-type and *cftr*<sup>-/-</sup> embryos. As a control, *ins:NTR* embryos treated with MTZ contain more glucose than *ins:NTR* embryos treated with vehicle. \*p < 0.05, ns = not significant, t-test.

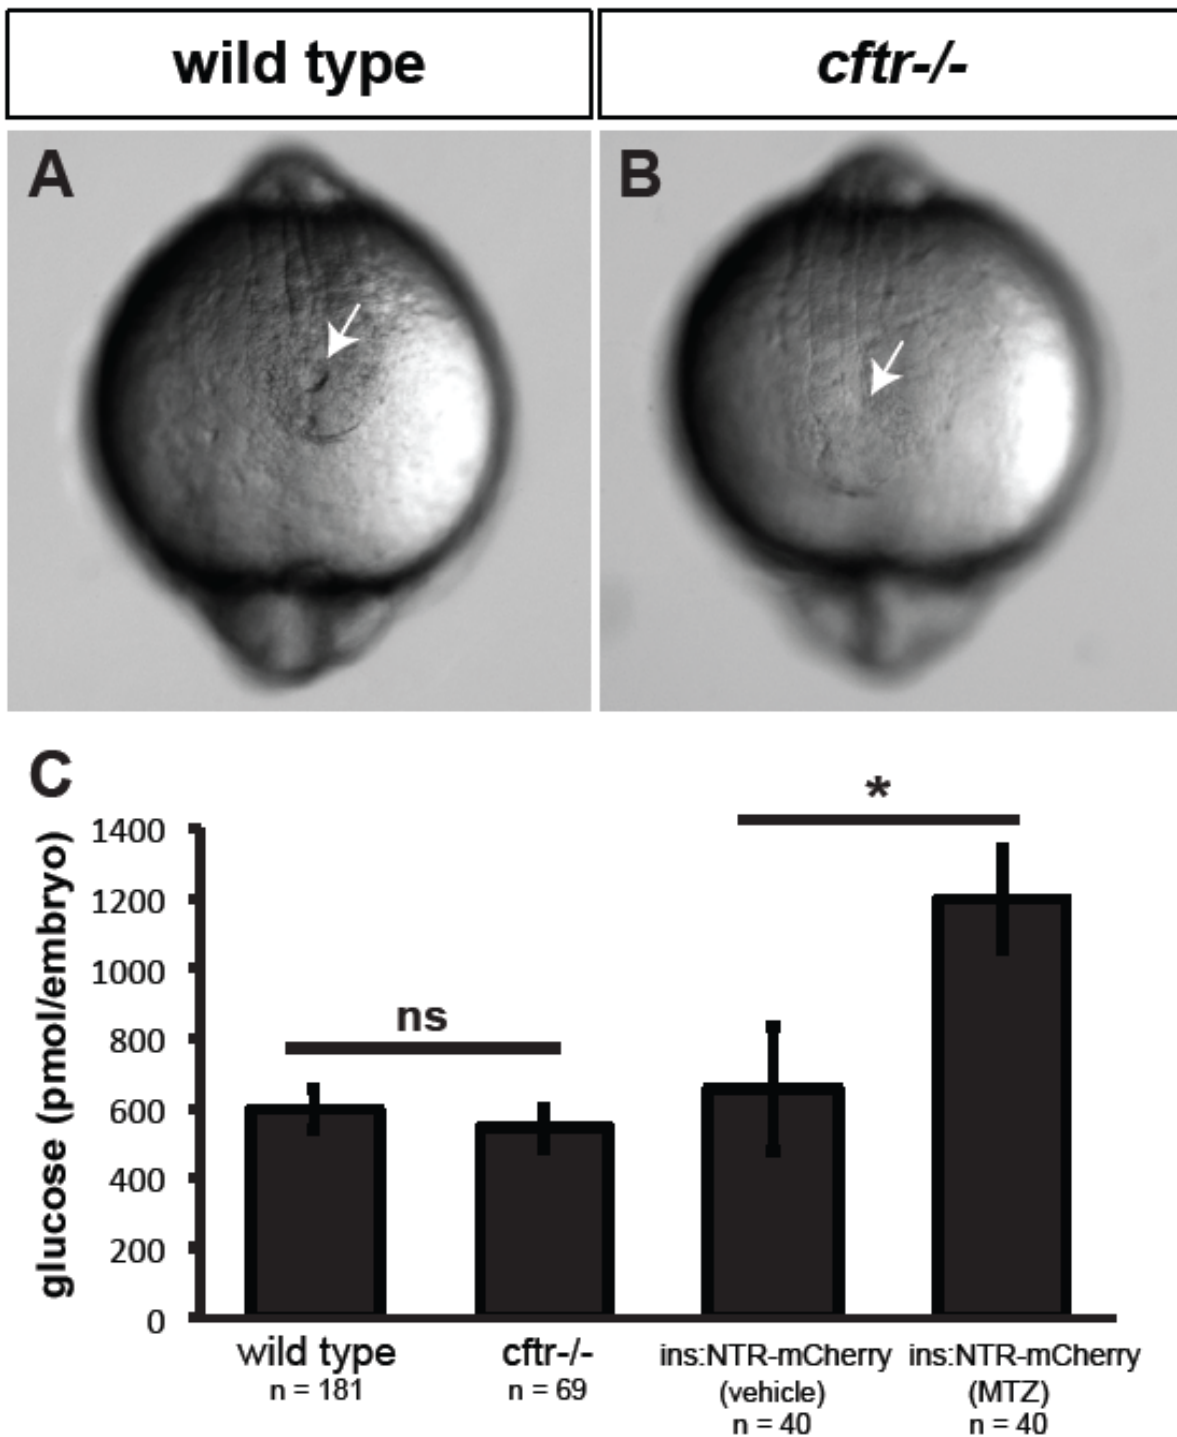

SUPPLEMENTARY DATA

**Supplementary Table 1. Genes Differentially Expressed in CACs vs non-CACs**

| ensembl id         | gene name            | Preparation 1 |           | Preparation 2 |           |
|--------------------|----------------------|---------------|-----------|---------------|-----------|
|                    |                      | fold change   | P         | fold change   | P         |
| ENSDARG00000089382 | zgc:158463           | 250589.627    | 0.000E+00 | 15.678        | 2.478E-13 |
| ENSDARG00000012269 | clcn1b               | 2144.024      | 1.862E-12 | 68.854        | 0.000E+00 |
| ENSDARG00000054562 | her15.1              | 1336.912      | 1.789E-11 | 18.995        | 6.845E-11 |
| ENSDARG00000090140 | TMEM196              | 645.479       | 6.535E-10 | 13.374        | 5.933E-05 |
| ENSDARG00000009215 | zgc:112437           | 569.971       | 2.173E-09 | 46.662        | 1.045E-06 |
| ENSDARG00000045141 | aqp8a.1              | 469.959       | 4.636E-09 | 13.017        | 5.240E-14 |
| ENSDARG00000041107 | cftr                 | 428.940       | 7.645E-09 | 29.001        | 0.000E+00 |
| ENSDARG00000054560 | her15.2              | 320.080       | 1.700E-08 | 20.747        | 1.119E-10 |
| ENSDARG00000069332 | TMEM72               | 252.812       | 4.994E-08 | 15.610        | 4.595E-07 |
| ENSDARG00000044975 | zgc:153629           | 230.014       | 2.063E-07 | 11.871        | 1.454E-14 |
| ENSDARG00000078638 | zgc:171750           | 226.078       | 1.621E-07 | 456.112       | 0.000E+00 |
| ENSDARG00000086857 | MUC21                | 207.098       | 1.555E-07 | 18.032        | 9.818E-07 |
| ENSDARG00000051711 | CR339041.3           | 194.463       | 1.732E-07 | 13.413        | 5.974E-07 |
| ENSDARG00000024032 | coch                 | 190.783       | 2.286E-07 | 19.583        | 0.000E+00 |
| ENSDARG00000088911 | CR774179.2           | 187.570       | 2.118E-07 | 34.981        | 3.763E-05 |
| ENSDARG00000019130 | plk2b                | 179.048       | 3.600E-07 | 6.923         | 9.116E-08 |
| ENSDARG00000088306 | CABZ0108873<br>7.1   | 176.823       | 3.049E-07 | 226.105       | 0.000E+00 |
| ENSDARG00000090738 | mylka                | 164.362       | 3.819E-07 | 9.386         | 4.810E-04 |
| ENSDARG00000086057 | PLXND1               | 160.300       | 5.023E-07 | 12.768        | 2.413E-03 |
| ENSDARG00000069103 | si:dkeyp-<br>82a1.4  | 160.247       | 5.181E-07 | 33.095        | 5.058E-13 |
| ENSDARG00000069608 | PALM2-<br>AKAP2      | 156.521       | 5.944E-07 | 12.080        | 4.909E-12 |
| ENSDARG00000091014 | CU138542.4           | 155.084       | 2.286E-06 | 56.772        | 6.539E-08 |
| ENSDARG00000057606 | arl4ca               | 150.142       | 8.712E-07 | 7.592         | 1.668E-04 |
| ENSDARG00000077424 | im:7137006           | 142.012       | 7.761E-07 | 20.080        | 1.501E-05 |
| ENSDARG00000074509 | TACR2                | 139.390       | 1.053E-06 | 11.045        | 5.764E-04 |
| ENSDARG00000053358 | BASP1                | 138.295       | 1.285E-06 | 20.894        | 0.000E+00 |
| ENSDARG00000058389 | si:ch211-<br>89f7.4  | 131.314       | 2.522E-06 | 4.223         | 6.692E-05 |
| ENSDARG00000016691 | cd9b                 | 127.967       | 1.680E-06 | 13.909        | 1.409E-11 |
| ENSDARG00000036820 | mgll                 | 127.004       | 2.418E-06 | 8.401         | 8.443E-11 |
| ENSDARG00000074319 | sall1a               | 123.492       | 2.415E-06 | 8.936         | 5.136E-11 |
| ENSDARG00000042707 | cx30.3               | 123.098       | 2.356E-06 | 20.866        | 0.000E+00 |
| ENSDARG00000075112 | si:dkey-<br>162b23.3 | 122.107       | 4.174E-06 | 25.424        | 1.034E-03 |
| ENSDARG00000059507 | BX323555.3           | 118.947       | 3.460E-06 | 6.889         | 4.527E-09 |
| ENSDARG00000014047 | cldn7b               | 115.910       | 5.149E-06 | 13.483        | 5.329E-15 |
| ENSDARG00000089038 | PLEKHG5              | 111.428       | 4.191E-06 | 6.852         | 4.849E-09 |
| ENSDARG00000042106 | hlxb9la              | 109.827       | 3.095E-06 | 33.522        | 3.878E-13 |

SUPPLEMENTARY DATA

|                           |                       |         |           |        |           |
|---------------------------|-----------------------|---------|-----------|--------|-----------|
| <b>ENSDARG00000069504</b> | IL12B                 | 108.944 | 2.627E-06 | 7.677  | 4.317E-03 |
| <b>ENSDARG00000022569</b> | nkx6.1                | 108.220 | 3.885E-06 | 4.977  | 1.607E-05 |
| <b>ENSDARG00000013576</b> | gadd45bb              | 105.162 | 6.561E-06 | 8.807  | 9.566E-11 |
| <b>ENSDARG00000078258</b> | GGT5                  | 101.729 | 4.034E-06 | 18.357 | 3.317E-08 |
| <b>ENSDARG00000044808</b> | slc4a4b               | 101.182 | 6.524E-06 | 13.089 | 1.152E-13 |
| <b>ENSDARG00000006514</b> | her6                  | 99.010  | 9.793E-06 | 7.359  | 1.503E-09 |
| <b>ENSDARG00000041051</b> | mid1ip1a              | 98.291  | 4.524E-06 | 31.566 | 3.126E-11 |
| <b>ENSDARG00000075406</b> | PVRL4                 | 94.594  | 8.544E-06 | 21.620 | 0.000E+00 |
| <b>ENSDARG00000069027</b> | ADM                   | 92.081  | 5.747E-06 | 30.734 | 1.565E-04 |
| <b>ENSDARG00000018383</b> | frzb                  | 91.947  | 1.151E-05 | 5.288  | 1.002E-06 |
| <b>ENSDARG00000005648</b> | olfml2a               | 91.709  | 7.760E-06 | 4.562  | 8.225E-05 |
| <b>ENSDARG00000089858</b> | COBLL1                | 89.802  | 9.282E-06 | 22.065 | 4.441E-16 |
| <b>ENSDARG00000079907</b> | si:ch211-<br>234e14.2 | 88.993  | 6.896E-06 | 40.291 | 6.975E-06 |
| <b>ENSDARG00000079155</b> | si:ch211-<br>67f13.8  | 88.382  | 7.301E-06 | 22.398 | 1.016E-09 |
| <b>ENSDARG00000060148</b> | sh3pxd2aa             | 86.659  | 1.847E-05 | 18.330 | 0.000E+00 |
| <b>ENSDARG00000053298</b> | nkx2.2a               | 85.872  | 9.579E-06 | 7.390  | 2.351E-06 |
| <b>ENSDARG00000016695</b> | p2rx1                 | 85.602  | 8.062E-06 | 25.424 | 1.034E-03 |
| <b>ENSDARG00000087607</b> | CU896640.1            | 84.882  | 9.377E-06 | 3.164  | 6.617E-03 |
| <b>ENSDARG00000068219</b> | B3GNT8                | 84.244  | 1.402E-05 | 11.201 | 1.943E-12 |
| <b>ENSDARG00000089441</b> | si:ch211-<br>105c13.3 | 83.483  | 1.304E-05 | 3.727  | 1.894E-03 |
| <b>ENSDARG00000027310</b> | BX004812.1            | 83.150  | 1.455E-05 | 21.751 | 1.221E-15 |
| <b>ENSDARG00000012078</b> | meis1                 | 82.285  | 1.789E-05 | 5.313  | 1.902E-06 |
| <b>ENSDARG00000020133</b> | JDP2                  | 81.973  | 2.599E-05 | 5.181  | 3.206E-06 |
| <b>ENSDARG00000005565</b> | entpd8                | 81.179  | 2.249E-05 | 7.345  | 2.197E-09 |
| <b>ENSDARG00000003411</b> | foxa2                 | 81.085  | 1.579E-05 | 12.298 | 4.148E-12 |
| <b>ENSDARG00000090953</b> | IGSF5                 | 77.740  | 1.660E-05 | 12.923 | 1.405E-08 |
| <b>ENSDARG00000036463</b> | cldn15a               | 76.942  | 3.362E-05 | 6.622  | 1.000E-08 |
| <b>ENSDARG00000000002</b> | ccdc80                | 75.096  | 1.869E-05 | 5.705  | 1.722E-05 |
| <b>ENSDARG00000042586</b> | CABZ0108465<br>5.1    | 74.509  | 1.617E-05 | 8.218  | 5.217E-06 |
| <b>ENSDARG00000010625</b> | clic2                 | 73.702  | 3.500E-05 | 4.029  | 1.382E-04 |
| <b>ENSDARG00000089544</b> | BX572619.6            | 73.390  | 2.914E-05 | 8.159  | 8.030E-08 |
| <b>ENSDARG00000034210</b> | si:dkey-<br>240h12.4  | 72.972  | 2.479E-05 | 9.362  | 8.980E-10 |
| <b>ENSDARG00000038969</b> | zgc:113142            | 72.420  | 2.798E-05 | 20.416 | 7.988E-12 |
| <b>ENSDARG00000039232</b> | DUSP8                 | 71.536  | 2.805E-05 | 3.739  | 1.220E-03 |
| <b>ENSDARG00000055158</b> | prox1                 | 70.712  | 3.672E-05 | 7.046  | 5.255E-09 |
| <b>ENSDARG00000091539</b> | ptprjb                | 69.448  | 3.012E-05 | 10.916 | 1.950E-09 |
| <b>ENSDARG00000095866</b> | fabp1b.2              | 68.651  | 2.660E-05 | 7.065  | 2.928E-03 |
| <b>ENSDARG00000059680</b> | fscn1                 | 68.535  | 3.298E-05 | 11.401 | 5.178E-10 |
| <b>ENSDARG00000003046</b> | sorbs2a               | 68.095  | 3.445E-05 | 6.648  | 1.167E-07 |
| <b>ENSDARG00000018787</b> | efna1b                | 65.443  | 4.426E-05 | 7.423  | 9.052E-09 |

SUPPLEMENTARY DATA

|                           |                      |        |           |         |           |
|---------------------------|----------------------|--------|-----------|---------|-----------|
| <b>ENSDARG00000052139</b> | notch3               | 65.083 | 7.371E-05 | 6.914   | 3.453E-09 |
| <b>ENSDARG00000035875</b> | tmem54               | 64.561 | 3.626E-05 | 5.095   | 4.970E-04 |
| <b>ENSDARG00000037960</b> | lrrc17               | 64.549 | 3.560E-05 | 8.863   | 2.558E-07 |
| <b>ENSDARG00000040534</b> | EPCAM                | 63.984 | 9.587E-05 | 7.391   | 1.203E-09 |
| <b>ENSDARG00000004433</b> | btk                  | 62.583 | 4.427E-05 | 3.989   | 1.660E-03 |
| <b>ENSDARG00000032724</b> | pmp22a               | 62.186 | 3.586E-05 | 18.709  | 3.655E-05 |
| <b>ENSDARG00000095453</b> | si:rp71-17i16.6      | 61.656 | 4.330E-05 | 13.147  | 7.885E-07 |
| <b>ENSDARG00000002779</b> | pdx1                 | 60.822 | 6.314E-05 | 3.967   | 3.777E-04 |
| <b>ENSDARG00000067831</b> | C10orf27             | 59.847 | 4.378E-05 | 11.337  | 4.300E-04 |
| <b>ENSDARG00000076981</b> | zgc:198329           | 59.542 | 7.809E-05 | 10.992  | 1.631E-12 |
| <b>ENSDARG00000077293</b> | SYNPO2L              | 59.229 | 4.518E-05 | 20.114  | 7.792E-03 |
| <b>ENSDARG00000005673</b> | f3b                  | 58.940 | 1.383E-04 | 4.880   | 4.007E-06 |
| <b>ENSDARG00000079092</b> | gprc5c               | 58.873 | 1.111E-04 | 10.359  | 4.837E-13 |
| <b>ENSDARG00000060610</b> | PCDH7                | 58.551 | 5.399E-05 | 5.945   | 3.217E-06 |
| <b>ENSDARG00000055100</b> | cxcl12b              | 58.187 | 5.404E-05 | 3.820   | 8.592E-04 |
| <b>ENSDARG00000090614</b> | PCDHAC1              | 58.101 | 5.726E-05 | 46.896  | 9.774E-07 |
| <b>ENSDARG00000038709</b> | MYADM                | 56.946 | 5.325E-05 | 214.445 | 0.000E+00 |
| <b>ENSDARG00000077540</b> | f2rl1.2              | 56.761 | 1.301E-04 | 12.137  | 2.154E-14 |
| <b>ENSDARG00000018921</b> | fam84a               | 56.575 | 6.751E-05 | 10.494  | 1.252E-10 |
| <b>ENSDARG00000044532</b> | nr4a2b               | 56.467 | 1.142E-04 | 7.453   | 2.000E-09 |
| <b>ENSDARG00000007982</b> | onecut1              | 56.305 | 8.209E-05 | 34.277  | 6.661E-16 |
| <b>ENSDARG00000055632</b> | smtnl                | 56.031 | 6.591E-05 | 4.102   | 1.036E-03 |
| <b>ENSDARG00000009544</b> | cldnb                | 55.105 | 1.084E-04 | 10.701  | 1.361E-11 |
| <b>ENSDARG00000079549</b> | CDC42EP1             | 53.810 | 1.031E-04 | 4.247   | 1.793E-04 |
| <b>ENSDARG00000052630</b> | pvr1b                | 53.647 | 7.809E-05 | 5.683   | 2.865E-03 |
| <b>ENSDARG00000073870</b> | si:dkey-31j3.9       | 51.765 | 1.272E-04 | 8.759   | 7.055E-10 |
| <b>ENSDARG00000076431</b> | AL732629.1           | 51.579 | 1.539E-04 | 4.799   | 9.745E-06 |
| <b>ENSDARG00000076496</b> | FRMD4B               | 51.218 | 1.018E-04 | 4.918   | 3.694E-03 |
| <b>ENSDARG00000020298</b> | btg2                 | 49.502 | 4.598E-04 | 3.486   | 2.708E-03 |
| <b>ENSDARG00000008030</b> | myl9b                | 49.498 | 2.598E-04 | 4.476   | 2.298E-05 |
| <b>ENSDARG00000042722</b> | blnk                 | 49.106 | 2.140E-04 | 3.583   | 1.028E-03 |
| <b>ENSDARG00000018643</b> | igf2a                | 48.903 | 1.591E-04 | 6.920   | 1.166E-07 |
| <b>ENSDARG00000015955</b> | cldnc                | 47.233 | 2.787E-04 | 10.700  | 6.060E-13 |
| <b>ENSDARG00000089354</b> | TSPAN4               | 46.910 | 1.899E-04 | 7.900   | 1.417E-08 |
| <b>ENSDARG00000014488</b> | ca2                  | 46.779 | 3.010E-04 | 5.410   | 5.495E-07 |
| <b>ENSDARG00000093233</b> | si:ch211-<br>215d8.2 | 46.576 | 1.556E-04 | 25.424  | 1.034E-03 |
| <b>ENSDARG00000076799</b> | rnd3a                | 46.070 | 2.081E-04 | 5.098   | 8.649E-06 |
| <b>ENSDARG00000088122</b> | CT583709.2           | 45.553 | 1.606E-04 | 27.824  | 4.337E-04 |
| <b>ENSDARG00000062788</b> | irg1l                | 44.877 | 3.111E-04 | 19.976  | 2.548E-13 |
| <b>ENSDARG00000091231</b> | BX572619.7           | 44.220 | 4.754E-04 | 3.930   | 2.006E-04 |
| <b>ENSDARG00000006202</b> | erbb3a               | 44.202 | 3.099E-04 | 15.594  | 6.117E-14 |
| <b>ENSDARG00000044569</b> | cldn19               | 43.392 | 1.859E-04 | 0.088   | 6.059E-03 |
| <b>ENSDARG00000015033</b> | slc23a1              | 41.635 | 2.822E-04 | 6.866   | 5.525E-06 |
| <b>ENSDARG00000093331</b> | si:ch211-            | 41.267 | 2.254E-04 | 9.172   | 6.284E-04 |



SUPPLEMENTARY DATA

|                           | 192f15.3             |        |           |         |           |
|---------------------------|----------------------|--------|-----------|---------|-----------|
| <b>ENSDARG00000062707</b> | PLAT                 | 41.151 | 3.077E-04 | 13.822  | 3.566E-07 |
| <b>ENSDARG00000086742</b> | ECM1                 | 40.980 | 5.106E-04 | 6.426   | 2.552E-08 |
| <b>ENSDARG00000003169</b> | magi1                | 40.972 | 5.546E-04 | 4.924   | 4.061E-06 |
| <b>ENSDARG00000011821</b> | plod2                | 40.757 | 3.705E-04 | 3.287   | 8.299E-03 |
| <b>ENSDARG00000070702</b> | s100v2               | 40.530 | 5.117E-04 | 5.007   | 3.797E-06 |
| <b>ENSDARG00000077084</b> | col28a1              | 40.378 | 2.540E-04 | 112.820 | 4.931E-13 |
| <b>ENSDARG00000036548</b> | s1pr2                | 40.343 | 3.470E-04 | 5.602   | 3.972E-05 |
| <b>ENSDARG00000094511</b> | ccl20                | 40.236 | 2.751E-04 | 8.469   | 3.748E-05 |
| <b>ENSDARG00000070174</b> | PLEKHH3              | 39.949 | 4.505E-04 | 4.317   | 2.840E-04 |
| <b>ENSDARG00000022650</b> | cyp2ad3              | 39.883 | 5.111E-04 | 5.146   | 4.848E-06 |
| <b>ENSDARG00000077811</b> | sox11a               | 39.860 | 2.711E-04 | 20.063  | 3.609E-10 |
| <b>ENSDARG00000009978</b> | icn                  | 39.827 | 4.946E-04 | 7.140   | 6.946E-07 |
| <b>ENSDARG00000059196</b> | si:ch73-<br>177h5.4  | 39.472 | 3.712E-04 | 13.351  | 3.752E-09 |
| <b>ENSDARG00000076548</b> | si:dkey-<br>266m15.5 | 39.282 | 5.133E-04 | 6.415   | 4.366E-07 |
| <b>ENSDARG00000042285</b> | ATP8B3               | 38.954 | 4.219E-04 | 5.235   | 6.031E-04 |
| <b>ENSDARG00000092870</b> | si:dkey-<br>100n23.4 | 37.302 | 4.168E-04 | 5.467   | 1.637E-03 |
| <b>ENSDARG00000021004</b> | C5                   | 37.146 | 9.851E-04 | 16.633  | 2.220E-16 |
| <b>ENSDARG00000010654</b> | ARHGAP42             | 37.009 | 6.154E-04 | 5.486   | 3.805E-06 |
| <b>ENSDARG00000026329</b> | ARHGAP29             | 36.796 | 8.334E-04 | 3.925   | 2.054E-04 |
| <b>ENSDARG00000042293</b> | ca4b                 | 36.223 | 5.673E-04 | 11.360  | 8.629E-11 |
| <b>ENSDARG00000052954</b> | RAB25                | 35.506 | 6.016E-04 | 4.841   | 3.121E-03 |
| <b>ENSDARG00000036245</b> | WIPF3                | 34.927 | 5.874E-04 | 5.786   | 2.326E-03 |
| <b>ENSDARG00000057714</b> | cmah                 | 34.527 | 8.830E-04 | 4.305   | 2.649E-04 |
| <b>ENSDARG00000031622</b> | nrp2a                | 34.074 | 8.567E-04 | 5.690   | 6.053E-05 |
| <b>ENSDARG00000069476</b> | spint2               | 34.001 | 1.420E-03 | 5.558   | 3.860E-07 |
| <b>ENSDARG00000039941</b> | OLFML2A              | 33.830 | 1.337E-03 | 6.282   | 2.724E-08 |
| <b>ENSDARG00000007108</b> | zgc:91985            | 32.765 | 7.613E-04 | 19.779  | 2.411E-07 |
| <b>ENSDARG00000021806</b> | zfp36l2              | 32.735 | 1.624E-03 | 3.152   | 7.030E-03 |
| <b>ENSDARG00000079355</b> | FLRT2                | 32.584 | 8.199E-04 | 9.366   | 2.365E-08 |
| <b>ENSDARG00000094056</b> | si:dkey-<br>235d18.6 | 32.235 | 6.753E-04 | 0.018   | 7.286E-09 |
| <b>ENSDARG00000077982</b> | elf3                 | 31.336 | 2.449E-03 | 8.718   | 3.652E-11 |
| <b>ENSDARG00000006705</b> | pkn2                 | 31.225 | 1.424E-03 | 4.268   | 9.035E-05 |
| <b>ENSDARG00000068874</b> | PTCHD3               | 31.187 | 9.811E-04 | 5.693   | 5.310E-03 |
| <b>ENSDARG00000094123</b> | si:dkey-<br>210i3.1  | 31.024 | 2.969E-03 | 13.973  | 7.641E-03 |
| <b>ENSDARG00000017127</b> | pdzk1ip1l            | 30.804 | 1.892E-03 | 4.985   | 3.213E-06 |
| <b>ENSDARG00000056206</b> | CAMK2G               | 30.505 | 1.314E-03 | 5.795   | 2.324E-05 |
| <b>ENSDARG00000034801</b> | MYLK                 | 29.918 | 1.416E-03 | 10.848  | 4.896E-08 |
| <b>ENSDARG00000062204</b> | sigirr               | 29.871 | 2.013E-03 | 3.959   | 2.427E-04 |
| <b>ENSDARG00000070162</b> | stox2                | 29.752 | 2.108E-03 | 5.275   | 9.019E-07 |

SUPPLEMENTARY DATA

|                            |                        |        |           |        |           |
|----------------------------|------------------------|--------|-----------|--------|-----------|
| <b>ENSDARG00000075718</b>  | rpz5                   | 29.708 | 1.912E-03 | 3.769  | 6.564E-04 |
| <b>ENSDARG00000002634</b>  | b4galt1                | 29.422 | 1.378E-03 | 4.924  | 3.766E-05 |
| <b>ENSDARG00000074381</b>  | FARP1                  | 29.371 | 1.901E-03 | 6.017  | 1.872E-06 |
| <b>ENSDARG00000044688</b>  | dusp4                  | 29.189 | 2.161E-03 | 3.658  | 1.063E-03 |
| <b>ENSDARG00000069378</b>  | pard6a                 | 28.900 | 1.605E-03 | 4.374  | 1.615E-04 |
| <b>ENSDARG00000069956</b>  | pdlim2                 | 28.224 | 2.349E-03 | 5.513  | 1.014E-06 |
| <b>ENSDARG00000087508</b>  | FP236869.1             | 28.190 | 3.142E-03 | 3.439  | 2.321E-03 |
| <b>ENSDARG00000006615</b>  | hnf1ba                 | 28.155 | 2.755E-03 | 7.865  | 4.387E-10 |
| <b>ENSDARG00000004782</b>  | fgfr3                  | 27.893 | 1.536E-03 | 4.496  | 8.538E-04 |
| <b>ENSDARG00000017165</b>  | slc3a1                 | 26.880 | 3.311E-03 | 5.913  | 6.046E-07 |
| <b>ENSDARG00000040513</b>  | zgc:92313              | 26.821 | 2.837E-03 | 3.465  | 2.164E-03 |
| <b>ENSDARG000000061827</b> | zbtb4                  | 26.763 | 3.384E-03 | 3.851  | 2.904E-04 |
| <b>ENSDARG000000086578</b> | zgc:158345             | 26.743 | 1.810E-03 | 22.238 | 3.419E-03 |
| <b>ENSDARG00000074390</b>  | tmem176l.4             | 26.409 | 2.348E-03 | 6.338  | 1.179E-06 |
| <b>ENSDARG00000079307</b>  | si:dkey-<br>205h13.1   | 26.395 | 2.554E-03 | 3.833  | 2.648E-03 |
| <b>ENSDARG00000079317</b>  | DLC1                   | 26.234 | 3.203E-03 | 3.615  | 8.677E-04 |
| <b>ENSDARG00000053344</b>  | gpr133                 | 25.817 | 4.510E-03 | 3.861  | 2.680E-04 |
| <b>ENSDARG00000019709</b>  | rhous                  | 25.726 | 2.717E-03 | 3.374  | 9.855E-03 |
| <b>ENSDARG00000075121</b>  | hbegfa                 | 25.651 | 4.304E-03 | 3.904  | 3.166E-04 |
| <b>ENSDARG00000057743</b>  | TMEM56                 | 25.444 | 1.870E-03 | 8.425  | 9.019E-03 |
| <b>ENSDARG00000003963</b>  | traf4a                 | 24.721 | 4.024E-03 | 3.733  | 9.250E-04 |
| <b>ENSDARG00000042939</b>  | gpr39                  | 24.546 | 5.124E-03 | 4.269  | 8.059E-05 |
| <b>ENSDARG00000077169</b>  | wu:fj08f03             | 24.532 | 4.276E-03 | 19.638 | 1.049E-08 |
| <b>ENSDARG00000039351</b>  | si:dkey-<br>200l5.2    | 24.476 | 5.239E-03 | 4.909  | 4.573E-05 |
| <b>ENSDARG00000027744</b>  | gadd45ba               | 24.399 | 6.432E-03 | 3.164  | 6.208E-03 |
| <b>ENSDARG00000029668</b>  | crim1                  | 24.357 | 3.284E-03 | 3.585  | 6.369E-03 |
| <b>ENSDARG00000041869</b>  | tnfrsf19               | 24.171 | 4.073E-03 | 6.471  | 2.625E-07 |
| <b>ENSDARG00000046124</b>  | rab11fip1a             | 24.159 | 4.016E-03 | 3.507  | 1.805E-03 |
| <b>ENSDARG00000078108</b>  | dok1a                  | 23.877 | 3.137E-03 | 7.889  | 9.846E-06 |
| <b>ENSDARG00000006693</b>  | tmprss4a               | 23.480 | 3.119E-03 | 6.901  | 7.230E-06 |
| <b>ENSDARG00000087844</b>  | plekhn1                | 23.300 | 6.373E-03 | 5.067  | 3.325E-06 |
| <b>ENSDARG00000089414</b>  | CU463857.1             | 23.159 | 2.826E-03 | 7.674  | 2.949E-06 |
| <b>ENSDARG00000069912</b>  | hmga2                  | 23.086 | 3.475E-03 | 5.455  | 6.962E-04 |
| <b>ENSDARG00000042518</b>  | hipk2                  | 22.692 | 8.177E-03 | 3.864  | 2.611E-04 |
| <b>ENSDARG00000067984</b>  | gas1b                  | 22.642 | 5.169E-03 | 3.252  | 9.623E-03 |
| <b>ENSDARG00000076120</b>  | foxp4                  | 22.642 | 7.238E-03 | 6.024  | 6.652E-08 |
| <b>ENSDARG00000036135</b>  | bbox1                  | 22.523 | 8.413E-03 | 6.395  | 3.572E-08 |
| <b>ENSDARG00000042071</b>  | PAM                    | 22.414 | 9.834E-03 | 3.458  | 1.787E-03 |
| <b>ENSDARG00000091408</b>  | CCDC165                | 22.320 | 4.612E-03 | 4.993  | 3.092E-03 |
| <b>ENSDARG00000057706</b>  | si:ch211-<br>137i24.10 | 22.207 | 9.377E-03 | 12.436 | 9.004E-14 |
| <b>ENSDARG00000089449</b>  | KAZN                   | 21.807 | 3.787E-03 | 9.299  | 3.529E-03 |
| <b>ENSDARG00000090526</b>  | C12H10orf81            | 21.755 | 4.151E-03 | 5.930  | 3.392E-03 |

SUPPLEMENTARY DATA

|                           |                  |        |           |         |           |
|---------------------------|------------------|--------|-----------|---------|-----------|
| <b>ENSDARG00000042956</b> | cyp2ad6          | 21.723 | 7.224E-03 | 4.538   | 1.596E-04 |
| <b>ENSDARG00000021366</b> | fbp1a            | 21.551 | 6.662E-03 | 3.830   | 2.187E-03 |
| <b>ENSDARG00000087431</b> | zgc:173962       | 21.321 | 4.353E-03 | 9.680   | 8.767E-03 |
| <b>ENSDARG00000088630</b> | ARHGEF10L        | 21.016 | 6.029E-03 | 4.397   | 5.161E-04 |
| <b>ENSDARG00000075764</b> | grik5            | 20.520 | 5.753E-03 | 7.541   | 3.718E-06 |
| <b>ENSDARG00000091766</b> | ARHGEF17         | 20.366 | 6.119E-03 | 7.606   | 3.401E-06 |
| <b>ENSDARG00000027609</b> | HPN              | 19.929 | 8.226E-03 | 5.479   | 1.462E-05 |
| <b>ENSDARG00000094428</b> | si:dkey-31f5.8   | 19.698 | 5.513E-03 | 11.560  | 1.178E-06 |
| <b>ENSDARG00000061672</b> | si:ch73-334d15.1 | 19.670 | 6.171E-03 | 11.735  | 2.902E-05 |
| <b>ENSDARG00000090967</b> | HPN              | 19.576 | 9.664E-03 | 5.392   | 5.841E-06 |
| <b>ENSDARG00000026166</b> | emilin1b         | 19.479 | 7.616E-03 | 3.692   | 5.047E-03 |
| <b>ENSDARG00000058323</b> | tmbim1           | 19.126 | 9.994E-03 | 3.212   | 8.159E-03 |
| <b>ENSDARG00000092899</b> | si:dkey-33i11.4  | 18.838 | 6.553E-03 | 11.854  | 4.837E-03 |
| <b>ENSDARG00000040469</b> | enpp6            | 18.837 | 8.225E-03 | 6.049   | 2.715E-03 |
| <b>ENSDARG00000079898</b> | cd248a           | 18.403 | 7.695E-03 | 4.764   | 7.805E-03 |
| <b>ENSDARG00000074721</b> | RASSF9           | 17.982 | 9.959E-03 | 5.085   | 1.510E-05 |
| <b>ENSDARG00000090665</b> | CABZ01063203.1   | 17.528 | 9.384E-03 | 6.156   | 1.431E-05 |
| <b>ENSDARG00000078279</b> | foxp3b           | 0.028  | 9.918E-03 | 0.183   | 1.006E-04 |
| <b>ENSDARG00000089731</b> | BX511311.7       | 0.026  | 7.639E-03 | 0.231   | 7.130E-05 |
| <b>ENSDARG00000075227</b> | GRM5             | 0.026  | 9.221E-03 | 0.244   | 7.401E-03 |
| <b>ENSDARG00000058775</b> | SLC22A3          | 0.026  | 7.714E-03 | 0.246   | 1.217E-03 |
| <b>ENSDARG00000060053</b> | KCNH2            | 0.025  | 6.765E-03 | 0.247   | 1.076E-03 |
| <b>ENSDARG00000070627</b> | BX908806.2       | 0.024  | 8.794E-03 | 0.230   | 9.646E-06 |
| <b>ENSDARG00000043475</b> | tagap            | 0.023  | 6.799E-03 | 0.120   | 5.114E-08 |
| <b>ENSDARG00000037995</b> | dvr1             | 0.023  | 5.717E-03 | 3.542   | 8.557E-03 |
| <b>ENSDARG00000071745</b> | CR456631.1       | 0.023  | 9.980E-03 | 0.144   | 4.249E-03 |
| <b>ENSDARG00000093004</b> | BX548044.8       | 0.022  | 7.485E-03 | 0.025   | 3.441E-12 |
| <b>ENSDARG00000053535</b> | lmo7b            | 0.021  | 4.748E-03 | 8.695   | 1.111E-08 |
| <b>ENSDARG00000078368</b> | si:dkey-199f5.4  | 0.020  | 7.296E-03 | 0.152   | 5.622E-06 |
| <b>ENSDARG00000094132</b> | igf1             | 0.019  | 6.568E-03 | 0.100   | 2.385E-04 |
| <b>ENSDARG00000090127</b> | CR855997.3       | 0.019  | 5.026E-03 | 161.052 | 3.331E-16 |
| <b>ENSDARG00000057769</b> | si:dkey-10f21.3  | 0.019  | 5.278E-03 | 0.197   | 1.936E-05 |
| <b>ENSDARG00000070885</b> | si:ch211-258l4.4 | 0.019  | 3.691E-03 | 0.096   | 1.397E-08 |
| <b>ENSDARG00000094927</b> | si:dkey-93l1.4   | 0.018  | 4.195E-03 | 0.238   | 7.213E-04 |
| <b>ENSDARG0000009550</b>  | foxi3b           | 0.017  | 9.434E-03 | 0.104   | 2.668E-03 |
| <b>ENSDARG00000094917</b> | BX324155.2       | 0.017  | 8.970E-03 | 28.907  | 2.955E-04 |
| <b>ENSDARG00000093631</b> | BX470083.8       | 0.017  | 2.540E-03 | 0.198   | 3.379E-05 |
| <b>ENSDARG00000071020</b> | si:dkey-42l16.1  | 0.017  | 3.036E-03 | 4.090   | 3.023E-03 |

SUPPLEMENTARY DATA

|                           |                        |       |           |       |           |
|---------------------------|------------------------|-------|-----------|-------|-----------|
| <b>ENSDARG00000014420</b> | elavl3                 | 0.017 | 3.267E-03 | 0.268 | 6.900E-03 |
| <b>ENSDARG00000079556</b> | C2CD4C                 | 0.016 | 4.132E-03 | 0.058 | 7.064E-05 |
| <b>ENSDARG00000094552</b> | CR450805.3             | 0.016 | 7.557E-03 | 0.011 | 9.717E-13 |
| <b>ENSDARG00000075598</b> | scpp6                  | 0.016 | 7.151E-03 | 0.016 | 6.212E-10 |
| <b>ENSDARG00000077665</b> | si:dkey-<br>236a14.6   | 0.016 | 1.952E-03 | 0.278 | 1.277E-03 |
| <b>ENSDARG00000094348</b> | CR848663.2             | 0.016 | 6.878E-03 | 0.012 | 5.984E-12 |
| <b>ENSDARG00000070340</b> | hoxc5a                 | 0.016 | 6.873E-03 | 0.025 | 6.741E-11 |
| <b>ENSDARG00000092514</b> | BX510654.1             | 0.015 | 6.573E-03 | 0.033 | 3.587E-10 |
| <b>ENSDARG00000092280</b> | si:ch211-<br>215m21.15 | 0.015 | 6.452E-03 | 0.095 | 6.573E-08 |
| <b>ENSDARG00000095577</b> | cybrd1                 | 0.015 | 1.982E-03 | 0.139 | 5.924E-03 |
| <b>ENSDARG00000094827</b> | si:ch211-<br>255l14.4  | 0.015 | 6.276E-03 | 0.120 | 9.492E-06 |
| <b>ENSDARG00000021032</b> | foxd3                  | 0.015 | 6.021E-03 | 0.024 | 7.620E-07 |
| <b>ENSDARG00000089640</b> | si:dkey-<br>117n7.5    | 0.015 | 6.021E-03 | 0.040 | 3.658E-04 |
| <b>ENSDARG00000021936</b> | zgc:109949             | 0.014 | 2.019E-03 | 0.291 | 7.990E-04 |
| <b>ENSDARG00000094014</b> | si:ch211-<br>165a10.4  | 0.014 | 3.524E-03 | 0.126 | 2.827E-08 |
| <b>ENSDARG00000063269</b> | DUPD1                  | 0.014 | 2.761E-03 | 0.184 | 5.679E-06 |
| <b>ENSDARG00000090413</b> | BX470083.5             | 0.014 | 5.259E-03 | 0.123 | 6.743E-04 |
| <b>ENSDARG00000043907</b> | FGF11                  | 0.014 | 2.219E-03 | 0.255 | 1.728E-03 |
| <b>ENSDARG00000070419</b> | nkdl                   | 0.014 | 1.536E-03 | 0.206 | 4.555E-06 |
| <b>ENSDARG00000040938</b> | C22H3orf32             | 0.014 | 5.019E-03 | 0.114 | 1.256E-03 |
| <b>ENSDARG00000052122</b> | rag1                   | 0.014 | 5.019E-03 | 0.277 | 7.219E-03 |
| <b>ENSDARG00000010384</b> | lpar6l                 | 0.014 | 5.007E-03 | 0.130 | 4.463E-04 |
| <b>ENSDARG00000094200</b> | si:dkey-2j6.2          | 0.014 | 4.953E-03 | 0.104 | 2.668E-03 |
| <b>ENSDARG00000092486</b> | si:dkey-<br>152b24.8   | 0.013 | 4.644E-03 | 0.056 | 7.440E-03 |
| <b>ENSDARG00000095771</b> | BX511311.11            | 0.013 | 1.440E-03 | 0.219 | 9.020E-06 |
| <b>ENSDARG00000070346</b> | hoxc8a                 | 0.013 | 2.385E-03 | 0.151 | 1.231E-03 |
| <b>ENSDARG00000092456</b> | si:ch211-<br>188i4.4   | 0.013 | 1.405E-03 | 0.297 | 1.314E-03 |
| <b>ENSDARG00000014391</b> | CSMD3                  | 0.013 | 1.770E-03 | 0.173 | 2.962E-06 |
| <b>ENSDARG00000035169</b> | layna                  | 0.012 | 3.549E-03 | 0.114 | 1.220E-03 |
| <b>ENSDARG00000094999</b> | si:ch211-<br>254p10.3  | 0.012 | 3.519E-03 | 0.138 | 3.802E-05 |
| <b>ENSDARG00000076789</b> | cx32.2                 | 0.012 | 1.048E-03 | 0.212 | 2.789E-04 |
| <b>ENSDARG00000069025</b> | si:ch211-<br>283g2.5   | 0.012 | 3.304E-03 | 0.114 | 6.744E-03 |
| <b>ENSDARG00000077938</b> | cd248b                 | 0.012 | 3.304E-03 | 0.095 | 2.206E-05 |
| <b>ENSDARG00000095450</b> | si:ch211-<br>213i16.2  | 0.012 | 3.280E-03 | 0.273 | 2.193E-03 |
| <b>ENSDARG00000009511</b> | tnfa                   | 0.012 | 3.195E-03 | 0.036 | 1.220E-04 |
| <b>ENSDARG00000090396</b> | CABZ0107494            | 0.011 | 1.069E-03 | 0.148 | 1.251E-05 |

SUPPLEMENTARY DATA

|                           | 6.1              |       |           |        |           |
|---------------------------|------------------|-------|-----------|--------|-----------|
| <b>ENSDARG00000054497</b> | chrna3           | 0.011 | 2.896E-03 | 0.034  | 2.442E-08 |
| <b>ENSDARG00000002502</b> | VAT1L            | 0.011 | 2.838E-03 | 0.198  | 3.403E-04 |
| <b>ENSDARG00000091445</b> | CU137681.8       | 0.011 | 2.811E-03 | 0.043  | 7.772E-16 |
| <b>ENSDARG00000067767</b> | BX510309.1       | 0.011 | 9.487E-04 | 0.213  | 1.781E-06 |
| <b>ENSDARG00000070121</b> | rhoh             | 0.011 | 2.717E-03 | 0.072  | 7.896E-04 |
| <b>ENSDARG00000045282</b> | BX322605.1       | 0.011 | 2.715E-03 | 0.160  | 4.804E-06 |
| <b>ENSDARG00000076873</b> | C9orf172         | 0.011 | 1.420E-03 | 4.296  | 9.548E-04 |
| <b>ENSDARG00000089567</b> | PATL2            | 0.011 | 1.361E-03 | 5.087  | 2.534E-04 |
| <b>ENSDARG00000041041</b> | cxcr3.2          | 0.011 | 2.513E-03 | 0.023  | 1.045E-11 |
| <b>ENSDARG00000076862</b> | FAM198A          | 0.011 | 2.447E-03 | 8.424  | 4.041E-05 |
| <b>ENSDARG00000036139</b> | lctla            | 0.011 | 2.444E-03 | 0.156  | 1.727E-03 |
| <b>ENSDARG00000013649</b> | CASR             | 0.011 | 2.426E-03 | 0.160  | 2.247E-05 |
| <b>ENSDARG00000091737</b> | zp2.2            | 0.011 | 2.421E-03 | 37.842 | 0.000E+00 |
| <b>ENSDARG00000092653</b> | si:dkey-1h24.6   | 0.010 | 1.892E-03 | 0.076  | 5.121E-06 |
| <b>ENSDARG00000074082</b> | CU467828.1       | 0.009 | 1.731E-03 | 8.423  | 9.047E-03 |
| <b>ENSDARG00000016348</b> | DIP2B            | 0.009 | 6.872E-04 | 3.644  | 1.423E-03 |
| <b>ENSDARG00000069984</b> | CR786578.1       | 0.009 | 1.600E-03 | 0.203  | 7.771E-06 |
| <b>ENSDARG00000053966</b> | cyp17a2          | 0.009 | 8.168E-04 | 0.262  | 2.206E-03 |
| <b>ENSDARG00000090613</b> | CABZ0104251      | 0.009 | 1.551E-03 | 0.154  | 3.788E-04 |
|                           | 3.3              |       |           |        |           |
| <b>ENSDARG00000076262</b> | pou3f2           | 0.009 | 1.443E-03 | 0.043  | 1.045E-11 |
| <b>ENSDARG00000074782</b> | GPR97            | 0.009 | 1.425E-03 | 0.050  | 4.734E-09 |
| <b>ENSDARG00000042130</b> | zp3a.2           | 0.009 | 1.423E-03 | 47.510 | 0.000E+00 |
| <b>ENSDARG00000087717</b> | TMPRSS5          | 0.008 | 1.340E-03 | 0.224  | 2.468E-03 |
| <b>ENSDARG00000092223</b> | si:dkey-211e20.1 | 0.008 | 8.472E-04 | 0.304  | 9.086E-03 |
| <b>ENSDARG00000086084</b> | CU571170.2       | 0.008 | 1.175E-03 | 0.201  | 9.453E-03 |
| <b>ENSDARG00000090151</b> | CT033790.3       | 0.008 | 1.120E-03 | 0.108  | 1.689E-09 |
| <b>ENSDARG00000086688</b> | AL772241.1       | 0.007 | 9.173E-04 | 0.138  | 9.252E-03 |
| <b>ENSDARG00000086403</b> | CR381537.1       | 0.007 | 8.937E-04 | 0.243  | 6.469E-04 |
| <b>ENSDARG00000093408</b> | si:dkey-1p9.3    | 0.007 | 8.546E-04 | 0.118  | 2.328E-06 |
| <b>ENSDARG00000090777</b> | PKD2L2           | 0.007 | 8.540E-04 | 0.326  | 8.577E-03 |
| <b>ENSDARG00000040433</b> | cyp2k22          | 0.007 | 4.312E-04 | 14.139 | 8.721E-04 |
| <b>ENSDARG00000089439</b> | TMEM132A         | 0.007 | 8.173E-04 | 0.079  | 1.184E-04 |
| <b>ENSDARG00000073809</b> | CR936484.2       | 0.007 | 7.992E-04 | 0.098  | 1.427E-13 |
| <b>ENSDARG00000079034</b> | wu:fi38e01       | 0.007 | 7.320E-04 | 4.080  | 1.388E-04 |
| <b>ENSDARG00000011633</b> | dnah9            | 0.007 | 1.823E-04 | 0.279  | 2.515E-03 |
| <b>ENSDARG00000043436</b> | si:dkey-5n18.1   | 0.006 | 3.060E-04 | 0.153  | 6.237E-04 |
| <b>ENSDARG00000092830</b> | NLRX1            | 0.006 | 5.575E-04 | 0.216  | 1.690E-03 |
| <b>ENSDARG00000059616</b> | hs3st2           | 0.006 | 5.472E-04 | 5.536  | 2.804E-04 |
| <b>ENSDARG00000076897</b> | CU570782.1       | 0.006 | 4.970E-04 | 0.090  | 1.494E-07 |
| <b>ENSDARG00000002816</b> | rasgrf2          | 0.006 | 1.548E-04 | 0.290  | 1.190E-03 |
| <b>ENSDARG00000089747</b> | FP565451.1       | 0.006 | 4.475E-04 | 0.310  | 7.278E-03 |
| <b>ENSDARG00000069251</b> | si:dkeyp-        | 0.005 | 3.997E-04 | 27.834 | 0.000E+00 |

SUPPLEMENTARY DATA

|                           | 50f7.2             |       |           |          |           |
|---------------------------|--------------------|-------|-----------|----------|-----------|
| <b>ENSDARG00000091232</b> | kcnj1              | 0.005 | 3.467E-04 | 0.183    | 1.789E-05 |
| <b>ENSDARG00000094631</b> | si:ch211-81a5.2    | 0.005 | 3.457E-04 | 0.159    | 2.772E-05 |
| <b>ENSDARG00000069692</b> | col7a1l            | 0.005 | 3.093E-04 | 0.176    | 2.038E-03 |
| <b>ENSDARG00000026049</b> | mxl                | 0.004 | 2.345E-04 | 0.164    | 2.382E-05 |
| <b>ENSDARG00000095715</b> | si:ch211-202e12.3  | 0.004 | 2.329E-04 | 0.256    | 2.417E-03 |
| <b>ENSDARG00000092016</b> | BX296549.2         | 0.004 | 2.174E-04 | 0.154    | 1.678E-07 |
| <b>ENSDARG00000040178</b> | zgc:92647          | 0.004 | 2.049E-04 | 0.117    | 1.089E-04 |
| <b>ENSDARG00000075551</b> | si:ch211-274p24.3  | 0.004 | 1.729E-04 | 0.205    | 3.468E-05 |
| <b>ENSDARG00000075342</b> | BX649628.1         | 0.004 | 1.670E-04 | 0.072    | 3.905E-07 |
| <b>ENSDARG00000086522</b> | zp2.5              | 0.004 | 1.630E-04 | 1128.149 | 0.000E+00 |
| <b>ENSDARG00000086096</b> | CT033790.1         | 0.004 | 1.592E-04 | 0.297    | 2.571E-03 |
| <b>ENSDARG00000058045</b> | tlr21              | 0.004 | 1.469E-04 | 0.207    | 5.627E-05 |
| <b>ENSDARG00000058386</b> | BX323449.1         | 0.004 | 1.277E-04 | 0.086    | 2.438E-10 |
| <b>ENSDARG00000057253</b> | si:dkey-236a14.13  | 0.003 | 1.044E-04 | 0.218    | 9.963E-05 |
| <b>ENSDARG00000095627</b> | c1qc               | 0.003 | 9.306E-05 | 0.142    | 1.746E-07 |
| <b>ENSDARG00000089682</b> | BX323556.1         | 0.003 | 4.082E-05 | 0.187    | 8.875E-07 |
| <b>ENSDARG00000092701</b> | FP016063.1         | 0.003 | 8.602E-05 | 0.061    | 1.273E-13 |
| <b>ENSDARG00000038226</b> | CABZ0107499<br>4.1 | 0.003 | 7.198E-05 | 0.158    | 1.001E-07 |
| <b>ENSDARG00000053833</b> | mtnr1ba            | 0.003 | 6.747E-05 | 0.107    | 2.382E-07 |
| <b>ENSDARG00000042712</b> | tim44              | 0.003 | 5.832E-05 | 45.186   | 1.604E-06 |
| <b>ENSDARG00000095804</b> | CH211-14C17.6      | 0.003 | 5.718E-05 | 0.238    | 2.619E-03 |
| <b>ENSDARG00000088626</b> | BX927341.2         | 0.003 | 5.427E-05 | 0.082    | 3.964E-09 |
| <b>ENSDARG00000075091</b> | CU571064.1         | 0.003 | 5.175E-05 | 0.098    | 1.378E-12 |
| <b>ENSDARG00000095591</b> | si:ch73-138e16.7   | 0.003 | 5.095E-05 | 239.188  | 0.000E+00 |
| <b>ENSDARG00000088658</b> | CU041380.1         | 0.003 | 4.669E-05 | 0.211    | 1.070E-05 |
| <b>ENSDARG00000079792</b> | BX511311.1         | 0.002 | 3.867E-05 | 0.105    | 2.005E-03 |
| <b>ENSDARG00000088745</b> | MFAP4              | 0.002 | 3.287E-05 | 0.119    | 1.420E-06 |
| <b>ENSDARG00000077344</b> | BX000700.1         | 0.002 | 2.907E-05 | 0.180    | 5.837E-04 |
| <b>ENSDARG00000056723</b> | si:dkey-24f17.5    | 0.002 | 1.073E-05 | 0.313    | 3.691E-03 |
| <b>ENSDARG00000057265</b> | si:dkey-236a14.11  | 0.002 | 2.015E-05 | 0.148    | 3.987E-06 |
| <b>ENSDARG00000057284</b> | si:dkey-1p9.2      | 0.002 | 1.679E-05 | 0.214    | 2.243E-05 |
| <b>ENSDARG00000052935</b> | BX629350.2         | 0.002 | 1.621E-05 | 0.097    | 1.193E-13 |
| <b>ENSDARG00000091103</b> | CABZ0106849<br>9.1 | 0.002 | 1.463E-05 | 0.250    | 5.873E-04 |
| <b>ENSDARG00000023236</b> | KCNH1              | 0.001 | 3.561E-06 | 0.183    | 1.642E-06 |
| <b>ENSDARG00000094144</b> | CU137681.9         | 0.001 | 1.161E-06 | 0.173    | 6.495E-08 |

SUPPLEMENTARY DATA

Supplementary Table 2. Transgenic Lines

| line                                                                 | abbreviation             | reference                 |
|----------------------------------------------------------------------|--------------------------|---------------------------|
| <i>Tg(HS4-sst2:CFP;ins:PhiYFP-m-dest1-2TA-nfsB)<sup>lmc009</sup></i> | <i>ins:NTR</i>           | this work                 |
| <i>Tg(Tp1glob:creER<sup>T2</sup>)<sup>yh1</sup></i>                  | cre driver               | Wang, et al. (2011)       |
| <i>Tg(T2Kβactin:loxP-stop-loxP-hmgb1-mCherry)<sup>jh15</sup></i>     | cre responder            | Wang, et al. (2011)       |
| <i>Tg(Tp1bglob:eGFP)<sup>um14</sup></i>                              | <i>Tp1:GFP</i>           | Wang, et al. (2011)       |
| <i>Tg(Tp1glob:hmgb1-mCherry)<sup>fh32</sup></i>                      | <i>Tp1:hmgb1-mCherry</i> | Wang, et al. (2011)       |
| <i>Tg(fli1aep:DsRed)</i>                                             | <i>fli:dsRed</i>         | Villefranc, et al. (2007) |
| <i>TgBAC(cftr-GFP)<sup>pd1041</sup></i>                              |                          | Navis, et al. (2013)      |
| <i>cftr<sup>pd1049</sup></i>                                         |                          | Navis, et al. (2013)      |
| <i>TgBAC(nkx2.2a:meGFP)<sup>vu17</sup></i>                           |                          | Ng, et al. (2005)         |

SUPPLEMENTARY DATA

**Supplementary Table 3. Primer Sequences**

| <u>qPCR</u>           |                               |                                |
|-----------------------|-------------------------------|--------------------------------|
| gene                  | fwd                           | rvs                            |
| <b>cftr</b>           | CCGCATTTTCACCACTCTCT          | CTCATCCCATGAAGCATGCA           |
| <b>clcn1b</b>         | CCGTCTGATTTACCCTGGTG          | TGAACCCAGATCTTTGTCC            |
| <b>her15</b>          | CTCCAAGCTTTCCAAGG             | AAAACCACCGTCATCTCCAG           |
| <b>nkx6.1</b>         | CGTGCTCACCACATCAAAC           | CGGTTTTGAAACCACACCTT           |
| <b>sox9b</b>          | AGGGCGAGAAGCGTCCGTTTGTG<br>G  | CGGTGCTGGAGTCGGGTGTTTCTG       |
| <b>bactin</b>         | CGAGCAGGAGATGGGAACC           | CAACGGAAACGCTCATTGC            |
| <u>in situ probes</u> |                               |                                |
| gene                  | fwd                           | rvs                            |
| <b>cftr</b>           | AGATCACCTGTGGAGGATGC          | CGGGCAGTAAACAACAAACC           |
| <b>clcn1b</b>         | AGTAGGATGTGCTGTTGGGG          | AGCTGCTGCCCTATCACTG            |
| <b>her15</b>          | TACTCCAAGCTTTCCAACAAGGAG<br>A | GCATTGATAATGCACAAATGATCAC<br>A |

**Supplementary Table 4. Antibodies**

| antigen                            | concentration | species               | source                         |
|------------------------------------|---------------|-----------------------|--------------------------------|
| <b>Nkx6.1</b>                      | 1:100         | mouse monoclonal      | DSHB                           |
| <b>GFP</b>                         | 1:400         | rabbit polyclonal     | Life Technologies              |
| <b>dsRed</b>                       | 1:400         | mouse monoclonal      | Clontech                       |
| <b>Insulin</b>                     | 1:400         | guinea pig polyclonal | Dako                           |
| <b>Glucagon</b>                    | 1:400         | rabbit polyclonal     | Dako                           |
| <b>fluorescent<br/>secondaries</b> | 1:400         |                       | Jackson<br>ImmunoResearch Labs |
